# Supplementary material for: Attenuation of hypertension by C-fiber stimulation of the human median nerve and the concept-based novel device
Source: PubMed Central journal article supplement (PMC6175881; doi:10.1038/s41598-018-33402-1), 2018-10-08
Supplement: 41598_2018_33402_MOESM1_ESM.pdf [file 41598_2018_33402_MOESM1_ESM.pdf]

<Supplementary information>

Attenuation of hypertension by C-fiber stimulation of the human median nerve and the concept-based novel device

**Authors:** Se Kyun Bang, Yeonhee Ryu, Suchan Chang, Chae Kwang Im, Jong Han Bae, Young Seob Gwak, Chae Ha Yang, and Hee Young Kim

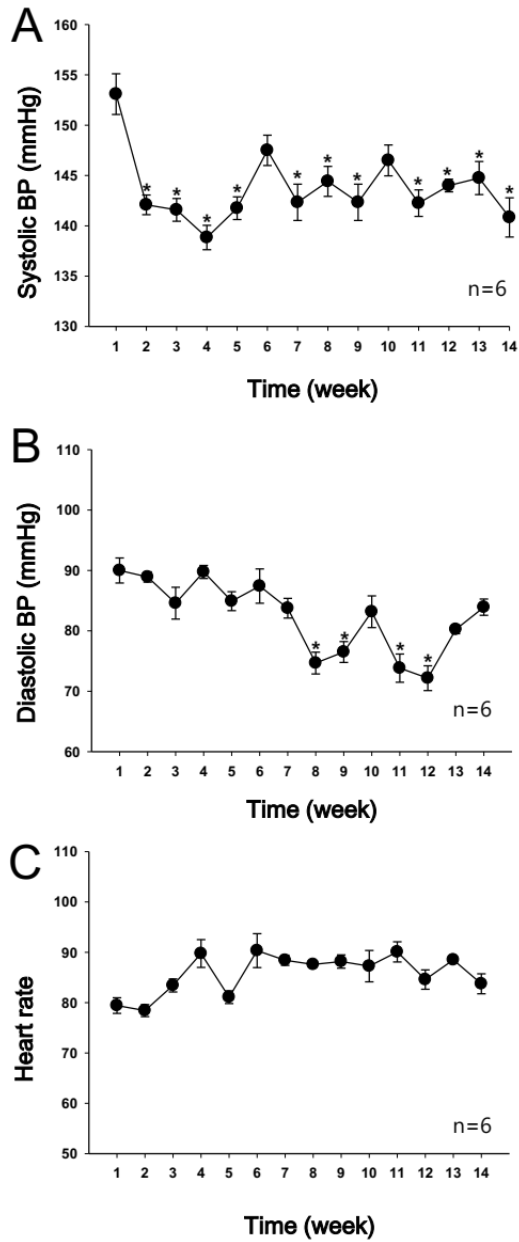

**Supplementary Figure 1.** Effects of repetitive TMNS on hypertension

Changes in basal systolic BP (A), diastolic BP (B) and HR (C) in the 6 participants who received repetitive TMNS over 14 weeks. \* $P < 0.05$  vs. the basal level before treatment (week 1).

## CONSORT 2010 Flow Diagram

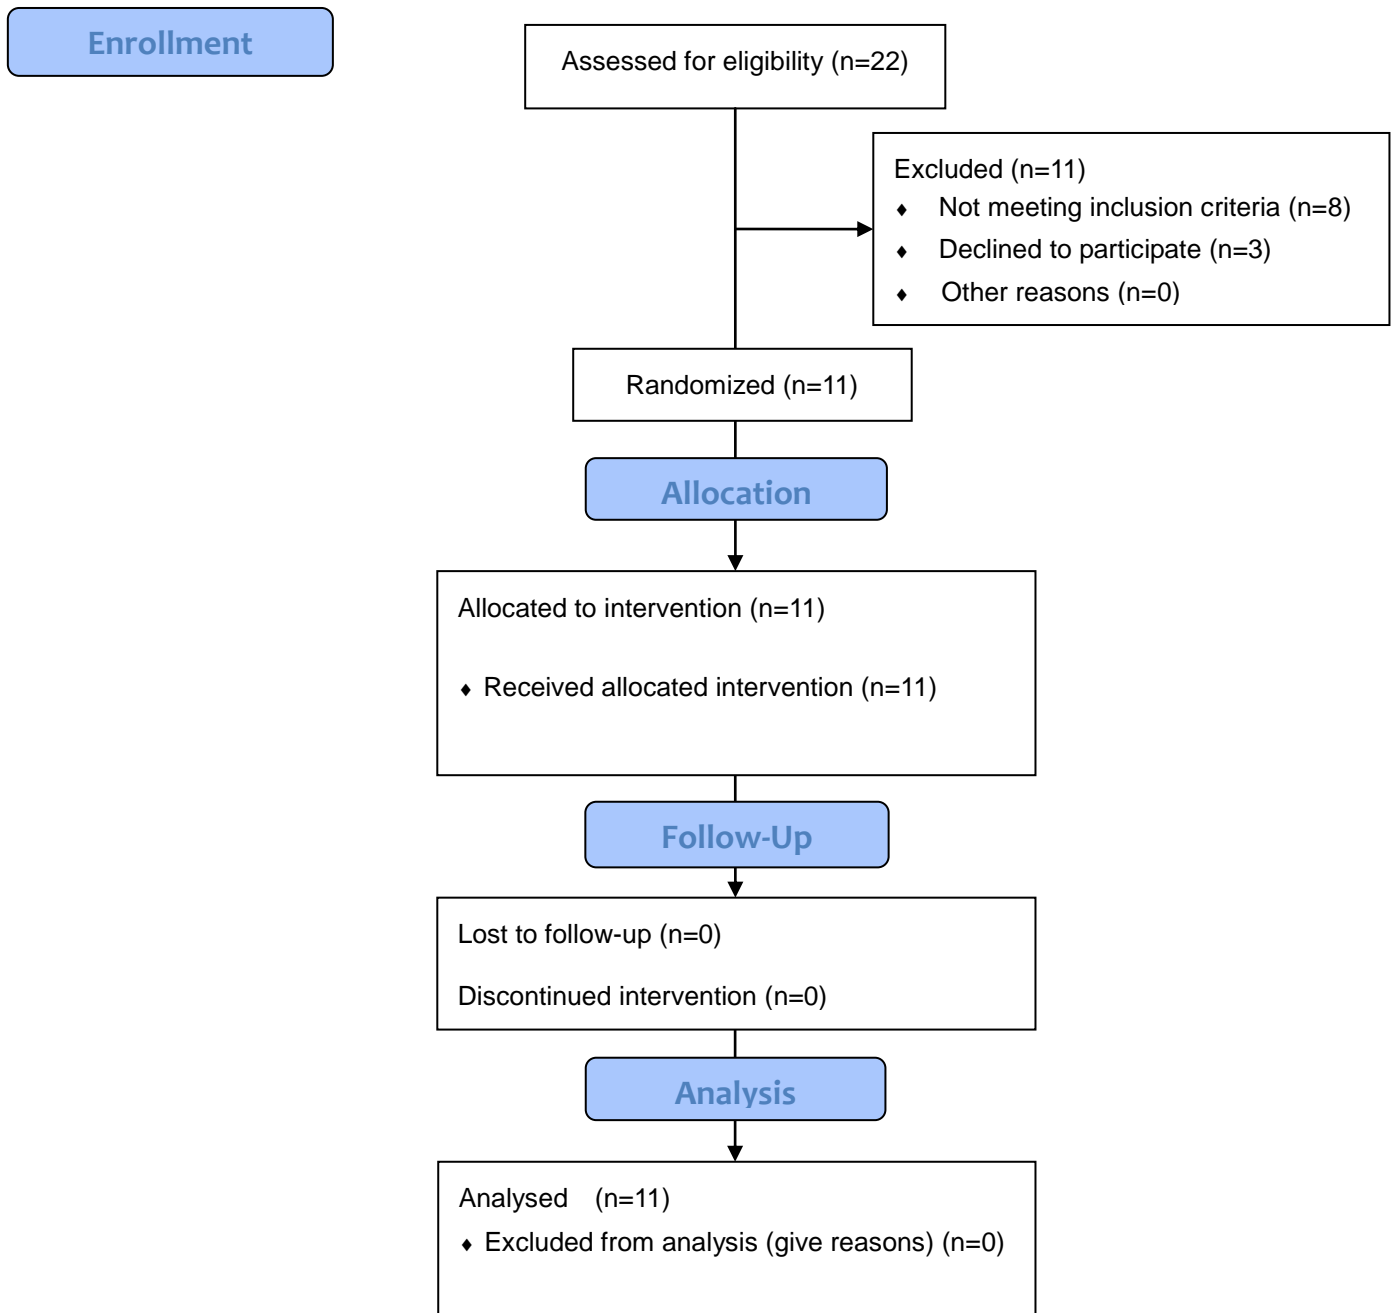

Supplementary figure 2. CONSORT 2010 Flow Diagram
